# Supplementary material for: High-speed space optical communication based on metal halide perovskite single crystals
Source: Royal Society of Chemistry journal article supplement (doi:10.1039/d3tc02123h), 2023-01-01
Supplement: d3tc02123h1.pdf [file d3tc02123h1.pdf]

# Support Information

## High-speed space optical communication based on metal halide perovskite single crystals

Xiangyu Xu<sup>a,b</sup>, Yuxuan Fu<sup>a</sup>, Li Zhang<sup>a</sup>, Chao Li<sup>c</sup>, Han Gao<sup>d</sup>, Yan Kuai<sup>a,b</sup>, Zhijia Hu<sup>a,b</sup>, Zhigang Cao<sup>\*a,b</sup>,  
Siqi Li<sup>\*a,b</sup>

a. Information Materials and Intelligent Sensing Laboratory of Anhui Province, Anhui University, Hefei, 230601, Anhui, P. R. China

b. Key Laboratory of Opto-Electronic Information Acquisition and Manipulation of Ministry of Education, Anhui University, Hefei, 230601, Anhui, P. R. China

c. Peng Cheng Laboratory, Shenzhen 518055, P. R. China

d. College of Optical and Electronic Technology, China Jiliang University, 310018, P. R. China

### **The method to prepare big-sized Cs<sub>4</sub>PbBr<sub>6</sub> Single Crystals.**

CsBr (0.4 M, Macklin 99.5%) and PbBr<sub>2</sub> (0.1 M, Macklin 99.0%) were separately added to a 5mL mixed solution of ethylene glycol and DMSO in a 1:4 ratio. The mixture was heated at 130°C for 1 hour to ensure complete dissolution of the powders. After cooling the solution from 130°C to 100°C, it was then gradually cooled at a rate of one degree per hour until reaching 20°C. The resulting larger crystals were collected, and following the steps, a new supersaturated solution was prepared. This process of cooling and crystallization was repeated more than ten times to obtain large single crystals.

### **Synthesis of CsPbBr<sub>3</sub> Single Crystals:**

Firstly, 0.638 g of CsBr (3 mmol, Macklin 99.5%) and 2.202 g of PbBr<sub>2</sub> (6 mmol, Macklin 99.0%) were individually weighed and placed into a 10 mL capacity beaker. Subsequently, 3 mL of DMSO solution was added using a pipette to the beaker, resulting in a precursor solution with a concentration of 1 mol/L (with Cs concentration at 1 mol/L). The beaker was sealed with aluminum foil and placed on a magnetic stirrer at 50°C in a water bath for 30 minutes with continuous stirring until the precursor solution turned transparent. The transparent precursor solution was then transferred to a temperature-controlled drying oven and kept at 120°C for 12 hours until several small crystals appeared at the bottom of the beaker.

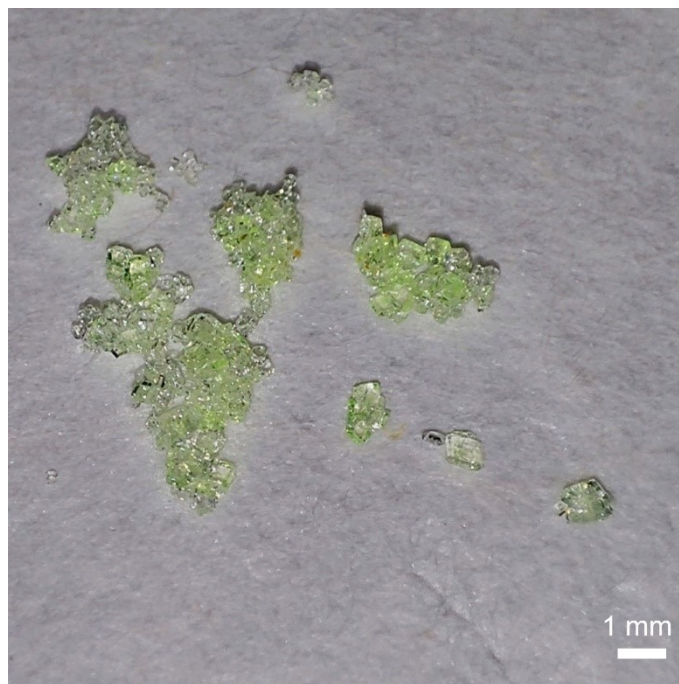

Figure S1 Images of millimeter-sized single crystals of Cs<sub>4</sub>PbBr<sub>6</sub> SCs assisted by HBr under natural light conditions.

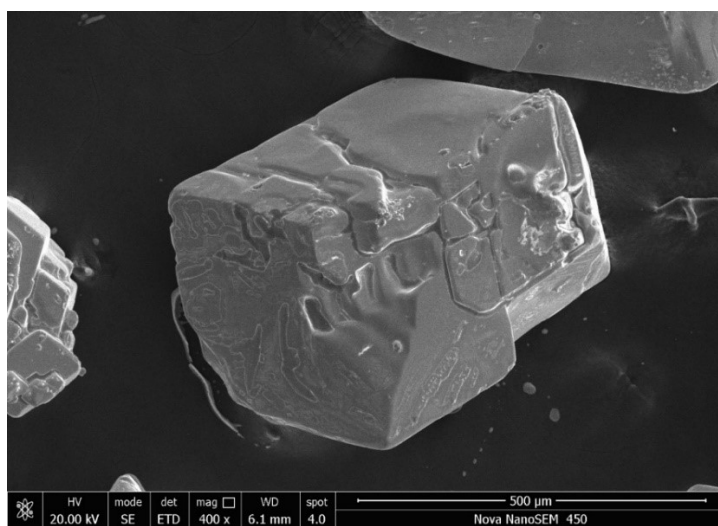

Figure S2 SEM image of millimeter-sized Cs<sub>4</sub>PbBr<sub>6</sub> SCs.

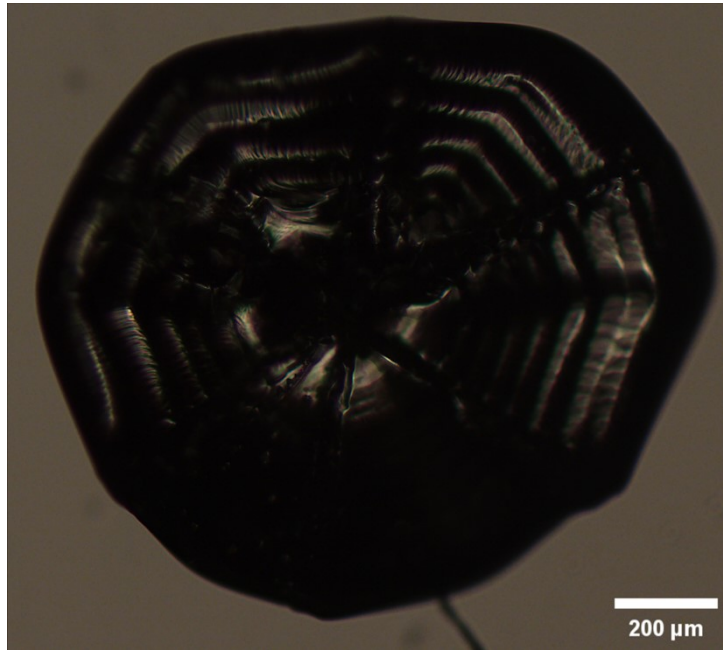

Figure S3 Image of millimeter-sized  $\text{Cs}_4\text{PbBr}_6$  SCs under 5X objective lens.

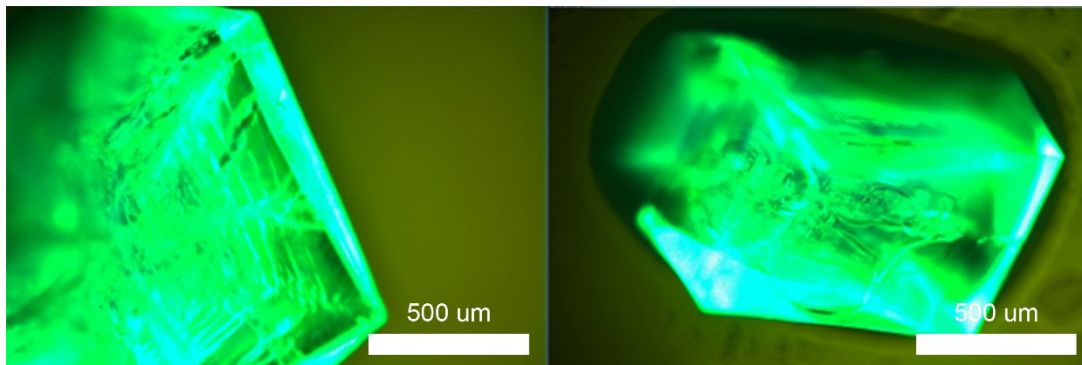

Figure S4 Images of millimeter-sized  $\text{Cs}_4\text{PbBr}_6$  SCs under 365 nm ultraviolet light.

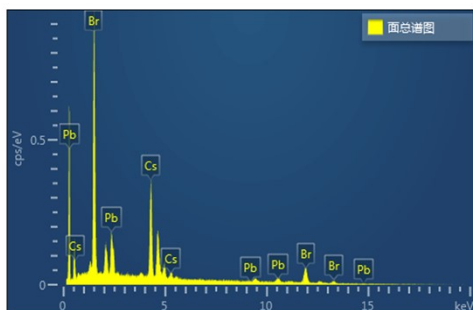

| 元素  | wt%    | 原子百分比  |
|-----|--------|--------|
| Br  | 42.60  | 58.08  |
| Cs  | 39.95  | 32.74  |
| Pb  | 17.45  | 9.18   |
| 总量: | 100.00 | 100.00 |

Figure S5 EDS spectrum and atomic composition

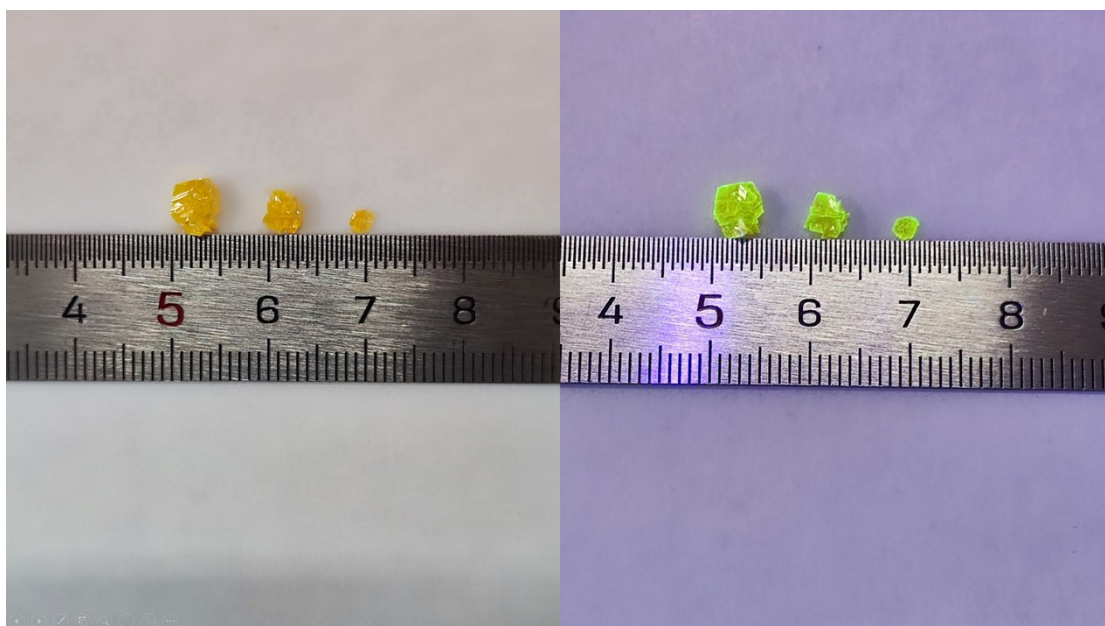

Figure S6 Cs<sub>4</sub>PbBr<sub>6</sub> SCs of different size under natural light and UV lamp.

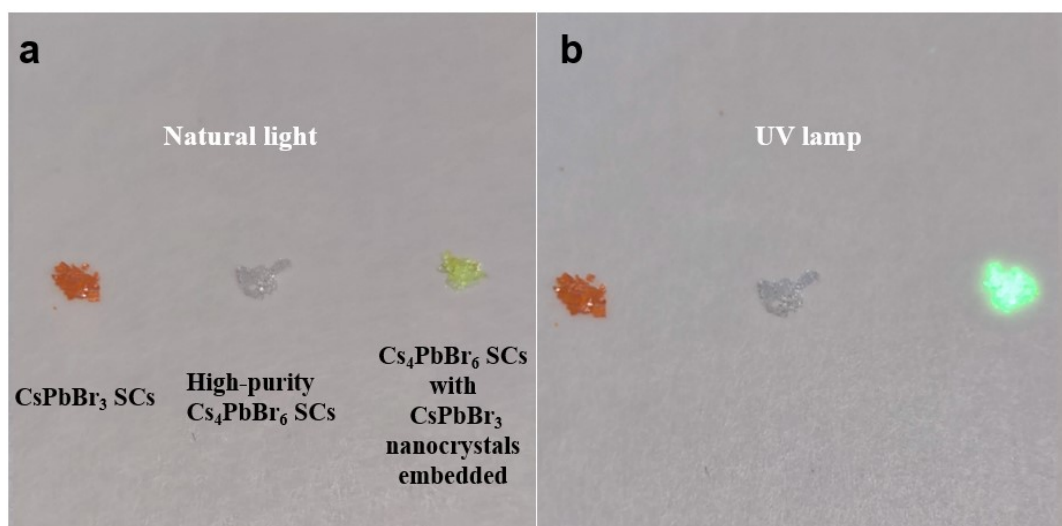

Figure S7 Photos of CsPbBr<sub>3</sub> SCs, high-purity Cs<sub>4</sub>PbBr<sub>6</sub> SCs and Cs<sub>4</sub>PbBr<sub>6</sub> SCs with CsPbBr<sub>3</sub> nanocrystals embedded under nature light and UV lamp.

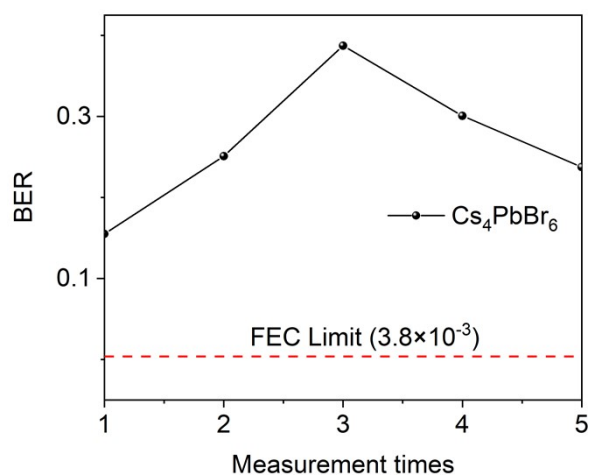

Figure S8 The BER of high-purity Cs<sub>4</sub>PbBr<sub>6</sub> SCs at a data rate of 10Mbps (measured 5 times).

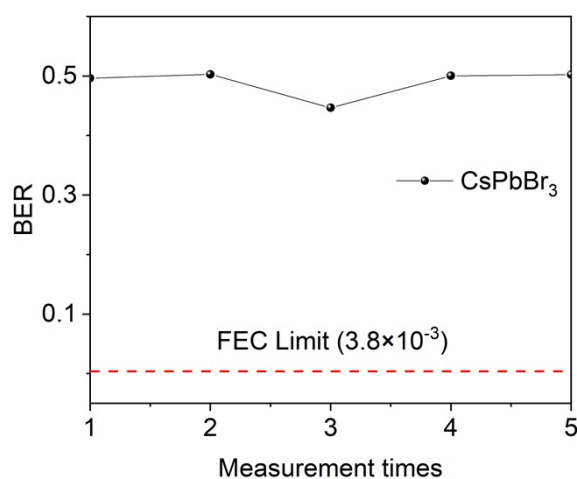

Figure S9 The BER of CsPbBr<sub>3</sub> SCs at a data rate of 10Mbps (measured 5 times).

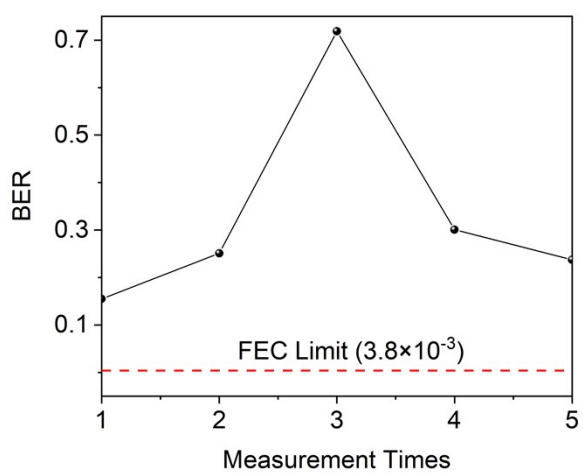

Figure S10 The BER of the biggest Cs<sub>4</sub>PbBr<sub>6</sub> SCs we obtained (~0.5 cm) at a data rate of 10Mbps (measured 5 times)
